# Supplementary material for: Continuous Manufacturing of Solvent-Free Cyclodextrin Inclusion Complexes for Enhanced Drug Solubility via Hot-Melt Extrusion: A Quality by Design Approach
Source: MDPI journal article supplement (doi:10.3390/pharmaceutics15092203), 2023-08-25
Supplement: s1 [file s1]

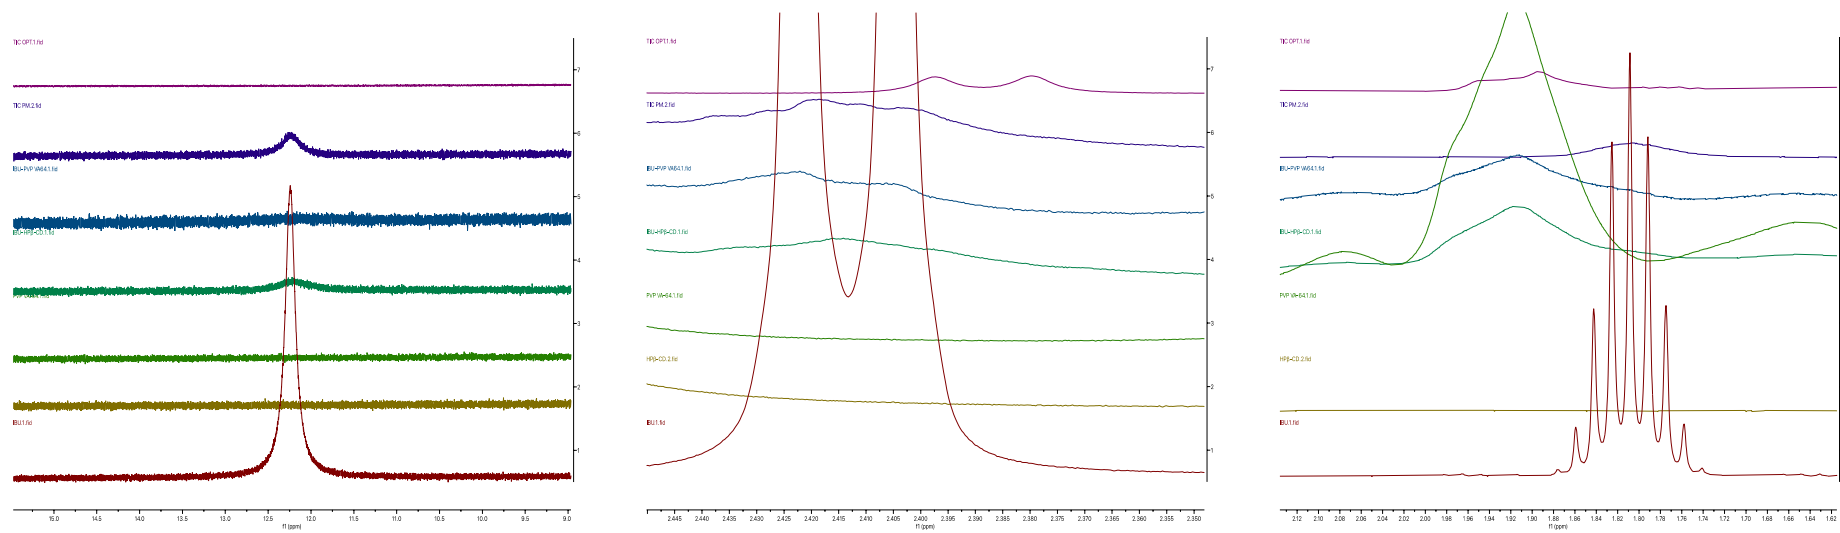

**Figure S1:** Detailed Chemical shifts in NMR spectrum of pure IBU and formulations

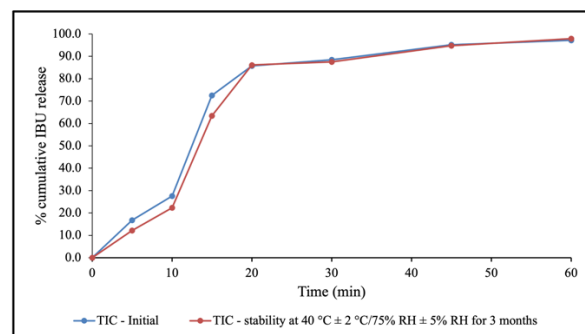

**A**

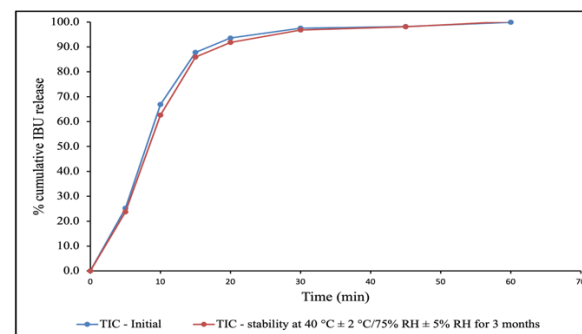

**B**

**Figure S2:** In vitro dissolution profiles of Pure IBU and various formulations in pH 7.2 phosphate buffer (A) and pH 1.2 0.1N HCl (B)

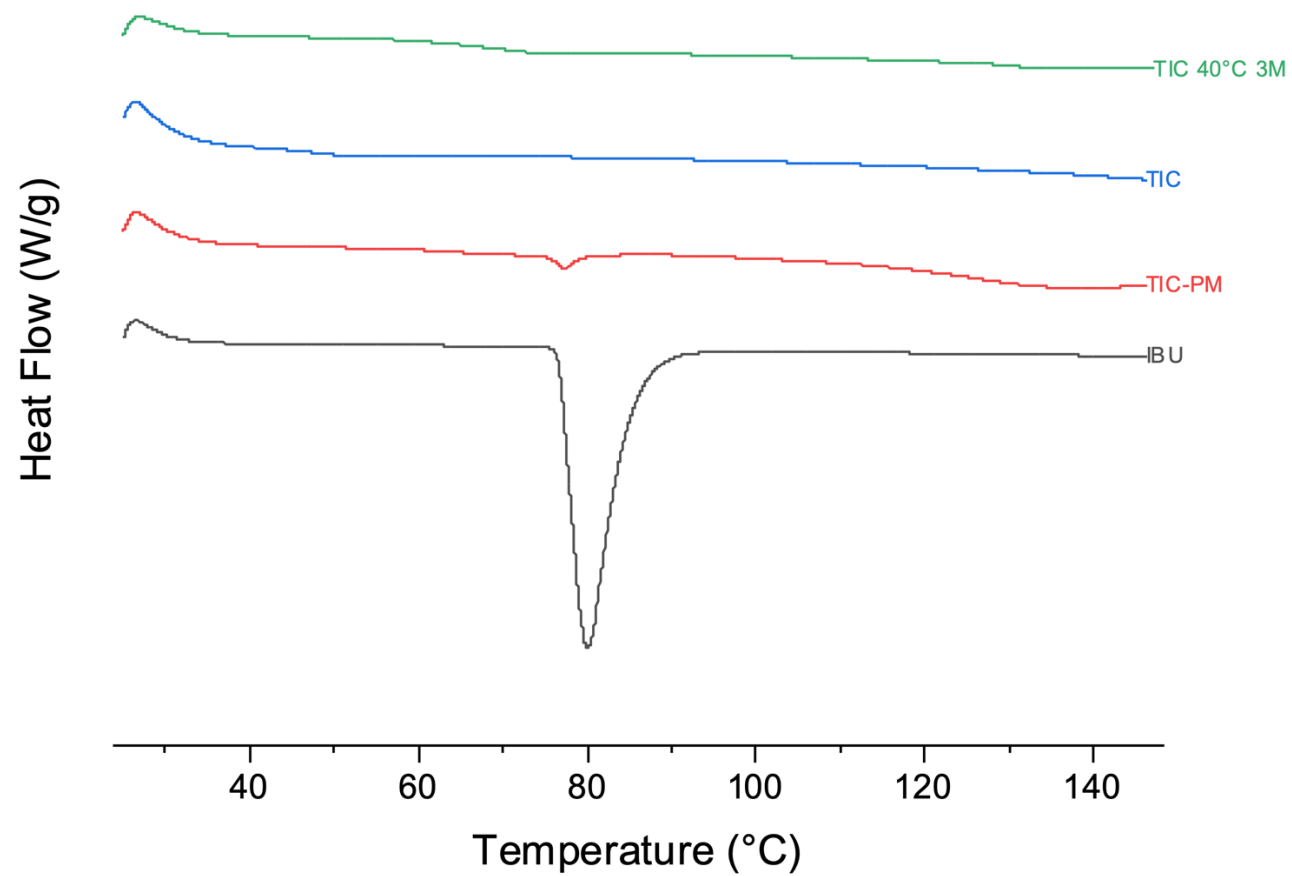

**Figure S3:** DSC thermograms of Pure IBU and formulations after 3months of stability at 40°C  $\pm$  2°C

**Table S1:** The Ks and CE of all the cyclodextrins.

| Cyclodextrin    | Ks (M)  | CE    |
|-----------------|---------|-------|
| $\alpha$ -CD    | 75.85   | 0.019 |
| $\beta$ -CD     | 365.32  | 0.091 |
| $\gamma$ -CD    | 100.11  | 0.025 |
| HP $\beta$ -CD  | 3279.62 | 0.820 |
| HP $\gamma$ -CD | 177.37  | 0.044 |

**Table S2:** <sup>1</sup>H Nuclear Magnetic Resonance (1H NMR) Chemical Shift Data

| Proton | IBU          | HPBCD | PVPVA-64 | IBU-HPBCD | $\Delta\delta A$ | IBU-PVPVA64 | $\Delta\delta B$ | TIC-PM | $\Delta\delta C$ | TIC OPT | $\Delta\delta D$ |
|--------|--------------|-------|----------|-----------|------------------|-------------|------------------|--------|------------------|---------|------------------|
| 1      | <b>12.24</b> | --    | --       |           | <b>ND</b>        |             | <b>ND</b>        | 12.23  | -0.01            |         | <b>ND</b>        |
| 2      | <b>7.19</b>  | --    | --       | 7.18      | -0.01            | 7.185       | 0.00             | 7.19   | 0.00             | 7.16    | -0.03            |
| 3      | <b>7.11</b>  | --    | --       | 7.1       | -0.01            | 7.1         | -0.01            | 7.11   | 0.00             | 7.08    | -0.03            |
| 4      | --           | 5.72  | --       | 5.72      | NA               |             | --               | 5.72   | NA               | 5.82    | NA               |
| 5      | --           | 4.84  | --       | 4.84      | NA               |             | --               | 4.84   | NA               | 4.82    | NA               |
| 6      | --           | 4.5   | 4.53     | 4.5       | NA               |             | NA               | 4.5    | NA               |         | NA               |
| 7      | --           | --    | 3.98     |           | --               |             | NA               |        | NA               |         | NA               |
| 8      | --           | --    | 3.76     |           | --               |             | NA               |        | NA               |         | NA               |
| 9      | <b>3.63</b>  | --    | --       | 3.61      | -0.01            | 3.62        | 0.00             | 3.64   | 0.02             | 3.65    | 0.03             |
| 10     | --           | 3.36  | 3.33     |           | NA               |             | NA               |        | NA               |         | NA               |
| 11     | <b>2.41</b>  | --    | --       | 2.51      | <b>0.10</b>      | 2.42        | 0.01             | 2.42   | 0.01             | 2.51    | <b>0.10</b>      |

|    |             |      |      |      |             |            |       |      |       |      |             |
|----|-------------|------|------|------|-------------|------------|-------|------|-------|------|-------------|
| 12 | --          | --   | 2.09 |      | --          |            | NA    |      | NA    |      | NA          |
| 13 | --          | --   | 1.91 |      | --          | 1.91       | NA    |      | NA    | 1.92 | NA          |
| 14 | <b>1.81</b> | --   | --   | 1.91 | <b>0.10</b> | 1.8        | -0.01 | 1.81 | 0.00  | 1.89 | <b>0.08</b> |
| 15 | --          | --   | 1.64 |      | --          |            | NA    |      | NA    |      | NA          |
| 16 | <b>1.34</b> | --   | --   | 1.33 | -0.01       | 1.34       | 0.00  | 1.33 | -0.01 | 1.32 | -0.02       |
| 17 | --          | 1.03 | --   | 1.03 | NA          |            | --    | 1.03 | NA    | 1.01 | NA          |
| 18 | <b>0.86</b> | --   | --   | 0.85 | -0.01       | 0.86571429 | 0.01  | 0.86 | 0.00  | 0.83 | -0.03       |
